# Supplementary material for: Self-Incompatibility in Brassicaceae: Identification and Characterization of SRK-Like Sequences Linked to the S-Locus in the Tribe Biscutelleae
Source: PubMed Central journal article supplement (PMC4065267; doi:10.1534/g3.114.010843), 2013-12-23
Supplement: supp_4.6.983_010843SI.pdf [file supp_4.6.983_010843SI.pdf]

## **SELF-INCOMPATIBILITY IN BRASSICACEAE: IDENTIFICATION AND CHARACTERIZATION OF SRK-LIKE SEQUENCES LINKED TO THE S-LOCUS IN THE TRIBE BISCUTELLEAE**

Jean-Baptiste Leducq\*†, Célia C Gosset§†, Rita Gries†, Kevin Calin†, Éric Schmitt†, Vincent Castric† & Xavier Vekeman†.

\*- *Institut de Biologie Intégrative et des Systèmes, Département de Biologie, PROTEO, Pavillon Charles-Eugène-Marchand, 1030 avenue de la Médecine - Université Laval - Québec (QC) G1V 0A6, Canada*

§- *Institut des Sciences de l'Évolution UMR 5554, CNRS, Université Montpellier 2, Place Eugène Bataillon, C.C. 065 - 34095 Montpellier cedex 05, France*

†- *Laboratoire Génétique et Evolution des Populations Végétales, CNRS UMR 8198, Université Lille1, F-59655 Villeneuve d'Ascq cedex, France*

Corresponding author: Jean-Baptiste Leducq ([jean-baptiste.leducq.1@ulaval.ca](mailto:jean-baptiste.leducq.1@ulaval.ca))

**DOI: 10.1534/g3.114.010843**

**Table S1** Accession numbers of SRK-related sequences for Figure 1, from *Arabidopsis halleri* (Aha), *A. lyrata* (Aly), *A. thaliana* (Ath), *Brassica oleraceae* (Bol), *B. rapa* (Bra) and *Capsella grandiflora* (Cgr).

| <i>Sequence</i>       | <i>Accession number</i> | <i>Sequence</i>        | <i>Accession number</i> |
|-----------------------|-------------------------|------------------------|-------------------------|
| <i>AhaSRK03</i>       | EU075126                | <i>BolSRK06</i>        | M76647.1                |
| <i>AhaSRK04</i>       | DQ520278                | <i>BolSRK07</i>        | AB070624.1              |
| <i>AhaSRK11</i>       | EU075132                | <i>BolSRK08</i>        | AB054708.1              |
| <i>AhaSRK12</i>       | EU075133                | <i>BolSRK11</i>        | AB054709.1              |
| <i>AhaSRK13</i>       | EU075134                | <i>BolSRK12</i>        | AB180901.1              |
| <i>AhaSRK15</i>       | EU075136                | <i>BolSRK13</i>        | AB024420.2              |
| <i>AhaSRK20</i>       | EU075141                | <i>BolSRK15</i>        | AB180903.1              |
| <i>AhaSRK22</i>       | EU075143                | <i>BolSRK16</i>        | AB054710.1              |
| <i>Aly327420</i>      | XM_002872670.1          | <i>BolSRK18</i>        | AB032473.1              |
| <i>AlyARK3_946052</i> | XM_002867806.1          | <i>BolSRK23</i>        | AB013720.1              |
| <i>AlySRK03</i>       | AF328992                | <i>BolSRK24</i>        | AB054712.1              |
| <i>AlySRK04</i>       | AF328994                | <i>BolSRK25</i>        | AB054713.1              |
| <i>AlySRK05</i>       | AF328990                | <i>BolSRK29</i>        | Z30211.1                |
| <i>AlySRK06</i>       | DQ520281                | <i>BolSRK33</i>        | AB054714.1              |
| <i>AlySRK08</i>       | AY186766                | <i>BolSRK35</i>        | AB054715.1              |
| <i>AlySRK09</i>       | DQ520282                | <i>BolSRK36</i>        | AB054716.1              |
| <i>AlySRK10</i>       | AY186767                | <i>BolSRK38</i>        | AB054717.1              |
| <i>AlySRK12</i>       | AY186769                | <i>BolSRK39</i>        | AB054718.1              |
| <i>AlySRK13</i>       | AF328993                | <i>BolSRK45</i>        | AB054719.1              |
| <i>AlySRK14</i>       | AY186770                | <i>BolSRK50</i>        | AB054720.1              |
| <i>AlySRK15</i>       | AY186771                | <i>BolSRK51</i>        | AB054721.1              |
| <i>AlySRK16</i>       | DQ520283                | <i>BolSRK57</i>        | AB054722.1              |
| <i>AlySRK18</i>       | DQ520284                | <i>BolSRK58</i>        | AB054723.1              |
| <i>AlySRK19</i>       | AF328998                | <i>BolSRK60</i>        | AB032474.1              |
| <i>AlySRK20</i>       | AF328995                | <i>BolSRK62</i>        | AB054724.1              |
| <i>AlySRK22</i>       | DQ520285                | <i>BolSRK64</i>        | AB054725.1              |
| <i>AlySRK23</i>       | AF328997                | <i>BraARK03_013522</i> | AB041621.1              |
| <i>AlySRK25</i>       | DQ520286                | <i>BraSRK46</i>        | AB013718.2              |
| <i>AlySRK27</i>       | EU878017                | <i>BraSRK54</i>        | AB219162.1              |
| <i>AlySRK29</i>       | AY186776                | <i>BraSRK60</i>        | AB097116.1              |
| <i>AlySRK30</i>       | EU878018                | <i>CgrSRK01</i>        | DQ530637.1              |
| <i>AlySRK33</i>       | EU878019                | <i>CgrSRK02</i>        | DQ530638.1              |
| <i>AlySRK35</i>       | EU878021                | <i>CgrSRK03</i>        | DQ530639.1              |
| <i>AlySRK36</i>       | DQ520288                | <i>CgrSRK04</i>        | DQ530640.1              |
| <i>AlySRK37</i>       | DQ520289                | <i>CgrSRK05</i>        | DQ530641.1              |
| <i>AlySRK38</i>       | EU165341                | <i>CgrSRK06</i>        | DQ530642.1              |
| <i>AlySRK39</i>       | EU878022                | <i>CgrSRK07</i>        | EF530735.1              |
| <i>AlySRK43</i>       | EU878024                | <i>CgrSRK09</i>        | FJ649955.1              |
| <i>AlySRK44</i>       | EU878025                | <i>CgrSRK11</i>        | FJ649956.1              |
| <i>AthSRKC</i>        | KC207414.1              | <i>CgrSRK14</i>        | FJ649958.1              |
| <i>BolSRK01</i>       | AB054706.1              | <i>CgrSRK18</i>        | FJ649953.1              |
| <i>BolSRK02</i>       | AJ306588.1              | <i>CgrSRK24</i>        | FJ649962.1              |
| <i>BolSRK03</i>       | X79432.1                | <i>CgrSRK37</i>        | FJ649959.1              |
| <i>BolSRK05</i>       | Y18259.1                | <i>CgrSRK38</i>        | FJ649960.1              |

**Table S2 List and sequences of primers targeting candidate sequences of the pollen-recognition extracellular domain of the *SRK* gene in *Biscutella neustriaca*.** T<sub>m</sub> indicates the optimized hybridization temperature during PCR reaction. When the number of PCR cycles used is different from 35 cycles, it is indicated after T<sub>m</sub> in parenthesis. Generalist primers amplify several sequences belonging to the same sequences class.

| Class             |          | F-specific primer       |          | R-specific primer      | T <sub>m</sub> (°C) | Sequence(s) amplified |
|-------------------|----------|-------------------------|----------|------------------------|---------------------|-----------------------|
| <i>Bne327420L</i> | X-F001   | GTACCGGAGATGCGGAAGT     | X-R540   | GAGCTCTCCGGACCAAATTA   | 60                  | 1 and 2               |
| <i>BneSRKA</i>    | A01-F142 | AGGTGGAATTCGACGTTAAA    | A01-R558 | GTAATTACTGATATCCAATA   | 52                  | 1                     |
|                   | A02-F277 | TTTACGAAGAGGAATCCGGT    | SLGR     |                        | 50                  | 2                     |
|                   | A03-F074 | TTAAACTCACCAGCCCAGAAT   | A03-R421 | TATCCACAGTTGCCGCCCTTG  | 62                  | 3                     |
|                   | A04-F068 | ACACTTTTCAACTCACCAAGCGA | SLGR     |                        | 59                  | 4 and 5               |
|                   | A06-F238 | GACATGGACACTTCACCGAT    | A06-R514 | CAGACCCATTATTTTCGGACA  | 62                  | 6                     |
|                   | A-F020   | GGGAACACATGGTTTCCAAC    | SLGR     |                        | 50                  |                       |
|                   | A-F300   | GTGGGAAAGGACAAATGGAA    | SLGR     |                        | 60                  | Generalist A          |
|                   | A-F294   | GSWTGAGTGGGAAAKGRCAA    | A-R461   | CYGCACATYTTTCTCACA     | 60                  |                       |
|                   | A-F330   | TGTGAGGAAGACACGGTTGA    | SLGR     |                        | 50                  | Generalist A and C01  |
| <i>BneSRKB</i>    | B01-F079 | ATGACCAACCAAACCATACAG   | SLGR     | ATCTGACATAAAGATCTTGACC | 52                  | 1                     |
|                   | B-F075   | CTTCATGACCAACCAAAGCA    | B-R495   | CGCATTTCGCAAATCCTCTAC  | 60                  | 3                     |
|                   | B04-F159 | ATATGGATGGAGACAGATGT    | B04-R371 | GTAAGCCATCTCCCCTGTA    | 60                  | 4                     |
|                   | B05-F112 | GTGAGTTTACGGGTCTTTTCG   | B05-R405 | TGTAGTATCCGGCAACTTAA   | 60                  | 5                     |
|                   | B06-F276 | GTTTGATCCTAGAAATCCACAT  | B06-R463 | CTTTAAGGCACCTCTTCTCA   | 60                  | 6                     |
|                   | B09-F147 | GATTCCGATATCAGATGACT    | B-R564   | WRCATAATCCGAATATCAA    | 50                  | 9                     |
|                   | B10-F238 | GACATGAACACGTCACCGGT    | B10-R452 | TTCTTACATTCTTTCGTATCA  | 52                  | 10                    |
|                   | B11-F153 | GACATCATATGAATGGAGCCCG  | B-R539   | AKCAYTYCYKTCCAAATAAC   | 52                  | 11                    |
|                   | B12-F110 | CTGTGAGTTTTACGGGCTTT    | B12-R408 | TGTAGTGTCCGGCAGCTTTACC | 63                  | 12                    |
|                   | B17-F115 | ACTTTCTGGGGTATTTAAATA   | B-R388   | TTATCTTCTCARCCSGTA     | 58<br>(40c)         | 17                    |
|                   | B-F055   | GATGARATCGCTTACACGTT    | B-R564   | WRCATAATCCGAATATCAA    | 54                  |                       |
|                   | B-F064   | GCTTACACGTTCYTMATGACC   | B-R388   | TTATCTTCTCARCCSGTA     | 50                  | Generalist B          |
|                   |          |                         | B-R539   | AKCAYTYCYKTCCAAATAAC   | 60                  |                       |
| <i>BneSRKC</i>    | C-F001   | GCTGCAGAGGTGACAAGTTTT   | C-R173   | GGATGGGTTGTCTGATTGG    | 56                  | 1                     |

**Table S3 Result of test of deviation from Mendelian expectations in collection F1 (See Table 3 for genotypes).** For each cohort size  $n$ , 100,000 cohorts were simulated according to two scenarios: (1) assuming that both parents were heterozygous at the  $S$ -locus and (2) assuming that one parent was homozygous and one parent heterozygous. For each cohort, the following information is shown: number of seedlings (cohort size), name of F0 parental individuals, absolute expected frequency of each genotype in the cohort and difference (deviation) between observed and expected frequencies under each scenario.

| Seedling collection | $n^a$ | Parents <sup>b</sup> |    | Expected genotype frequency in F1 (SD) <sup>c</sup> |                 | Deviation from expected genotype frequency (associated $p$ -value) <sup>d</sup> |                   |                  |                     |                |            |
|---------------------|-------|----------------------|----|-----------------------------------------------------|-----------------|---------------------------------------------------------------------------------|-------------------|------------------|---------------------|----------------|------------|
|                     |       |                      |    |                                                     |                 | (1) He <sup>e</sup>                                                             |                   |                  | (2) Ho <sup>f</sup> |                |            |
|                     |       |                      |    |                                                     |                 | 1                                                                               | 2                 | 3                | 4                   | 1              | 2          |
| F1o                 | 7     | 3                    | 6  | 1.75<br>(1.15)                                      | 3.50<br>(1.32)  | -2.25*<br>(0.01)                                                                | -1.25 (0.07)      | -                | -                   | -0.5<br>(0.23) | 0.5 (0.50) |
|                     | 13    | 3                    | 7  | 3.25<br>(1.56)                                      | 6.50 (1.8)      | -3.75*<br>(0.01)                                                                | -2.75*<br>(0.03)  | -                | -                   | -0.5<br>(0.30) | 0.5 (0.50) |
|                     | 5     | 8                    | 4  | 1.25<br>(0.97)                                      | 2.50<br>(1.12)  | -0.75<br>(0.11)                                                                 | 0.25 (0.37)       | -0.75<br>(0.10)  | -                   | -              | -          |
|                     | 7     | 8                    | 6  | 1.75<br>(1.15)                                      | 3.50<br>(1.33)  | 0.75<br>(0.45)                                                                  | -1.25 (0.07)      | -1.25<br>(0.07)  | -                   | -              | -          |
|                     | 21    | 9                    | 4  | 5.25<br>(1.98)                                      | 10.50<br>(2.29) | 1.25<br>(0.37)                                                                  | 4.25*<br>(0.02)   | -4.75*<br>(0.01) | -0.75<br>(0.26)     | -              | -          |
|                     | 7     | 9                    | 6  | 1.75<br>(1.14)                                      | 3.50<br>(1.32)  | -1.25<br>(0.07)                                                                 | -0.25 (0.24)      | -0.25<br>(0.24)  | -                   | -              | -          |
|                     | 6     | 10                   | 4  | 1.50<br>(1.06)                                      | 3.00<br>(1.22)  | 0.5 (0.47)                                                                      | -2.5* (0.01)      | 0.5 (0.47)       | -                   | -              | -          |
|                     | 16    | 10                   | 6  | 4.00<br>(1.73)                                      | 8.00<br>(2.00)  | 2 (0.20)                                                                        | -2<br>(0.08)      | -2 (0.08)        | 2 (0.20)            | -              | -          |
| F1c                 | 14    | 4                    | 20 | 3.50<br>(1.62)                                      | 7.00<br>(1.87)  | 0.5 (0.48)                                                                      | 1.5 (0.28)        | -0.5 (0.26)      | -1.5<br>(0.11)      | -              | -          |
|                     | 30    | 12                   | 8  | 7.50<br>(2.37)                                      | 15.00<br>(2.74) | 0.5 (0.49)                                                                      | 1.5 (0.35)        | 1.5 (0.35)       | -3.5<br>(0.05)      | -              | -          |
|                     | 30    | 17                   | 18 | 7.50<br>(2.37)                                      | 15.00<br>(2.73) | -5.5*<br>(0.01)                                                                 | -9.5***<br>(0.00) | -                | -                   | 2 (0.29)       | -2 (0.18)  |
|                     | 50    | 18                   | 1  | 12.50<br>(3.06)                                     | 25.00<br>(3.54) | 1.5 (0.38)                                                                      | -2.5 (0.16)       | 3.5 (0.16)       | -2.5<br>(0.16)      | -              | -          |
|                     | 14    | 21                   | 8  | 3.50<br>(1.62)                                      | 7.00<br>(1.87)  | -0.5<br>(0.26)                                                                  | 2.5 (0.10)        | -1.5 (0.11)      | -0.5<br>(0.26)      | -              | -          |

a cohort size

b F0 collection

c expected genotype frequency in F1 collection following symbols are associated with significance of  $p$ -values: "\*\*\*\*":  $p \leq 0.001$ ; "\*\*";  $p \leq 0.05$ .

d expected frequency : see table 3

e assuming that both parents are heterozygous at the  $S$ -locus

f assuming that parent 1 is homozygous and that parent 2 is heterozygous at the  $S$ -locus - Not applied for cohorts with more than two genotypes

**Table S4** Accession numbers of SRK-L sequences found in *Biscutella neustriaca*.

| Sequence            | Accession number |
|---------------------|------------------|
| <i>BneSRKL_A01a</i> | KF905296         |
| <i>BneSRKL_A01b</i> | KF905297         |
| <i>BneSRKL_A02</i>  | KF905298         |
| <i>BneSRKL_A03</i>  | KF905299         |
| <i>BneSRKL_A04</i>  | KF905300         |
| <i>BneSRKL_A05</i>  | KF905301         |
| <i>BneSRKL_A06</i>  | KF905302         |
| <i>BneSRKL_A07</i>  | KF905303         |
| <i>BneSRKL_B01</i>  | KF905304         |
| <i>BneSRKL_B03</i>  | KF905305         |
| <i>BneSRKL_B04</i>  | KF905306         |
| <i>BneSRKL_B05</i>  | KF905307         |
| <i>BneSRKL_B06</i>  | KF905308         |
| <i>BneSRKL_B09</i>  | KF905309         |
| <i>BneSRKL_B10</i>  | KF905310         |
| <i>BneSRKL_B11</i>  | KF905311         |
| <i>BneSRKL_B12</i>  | KF905312         |
| <i>BneSRKL_B13</i>  | KF905313         |
| <i>BneSRKL_B17</i>  | KF905314         |
| <i>BneSRKL_B18</i>  | KF905315         |
| <i>BneSRKL_C01</i>  | KF905295         |
| <i>BneARK3L_1</i>   | KF905320         |
| <i>BneARK3L_2</i>   | KF905321         |
| <i>BneARK3L_3</i>   | KF905322         |
| <i>BneARK3L_4</i>   | KF905323         |
| <i>BneARK3L_5</i>   | KF905324         |
| <i>Bne327420L_1</i> | KF905316         |
| <i>Bne327420L_2</i> | KF905317         |
| <i>Bne327420L_3</i> | KF905318         |
| <i>Bne327420L_4</i> | KF905319         |

| S01                       |     |        | Pollen donors |         |       |       |       |       |        |        |      |         | Controls |       | S-shared vs. Controls |      | Expressed in stigma ? |     |
|---------------------------|-----|--------|---------------|---------|-------|-------|-------|-------|--------|--------|------|---------|----------|-------|-----------------------|------|-----------------------|-----|
|                           |     |        | F0            |         |       | F1    |       |       |        |        |      |         |          |       |                       |      |                       |     |
| S-haplotypes              |     | Plants | S01           | S01     | S01   | S01   | S01   | S01   | S01    | S01    | S01  | S01     | S01      | S01   | S01                   | S01  | S01                   | S01 |
| 1                         | 2   |        | 1             | 2       | 1     | 2     | 1     | 2     | 2      | 3      | 4    | 1       |          |       |                       |      |                       |     |
| F0                        | S01 | S02    | 1             | 0/5     | 1/10  | 0/5   | /     | /     | /      | /      | /    | /       | /        | 59/65 |                       | yes  |                       |     |
|                           | S01 | S11    | 2             | 9/10**  | 0/10  | 0/10* | /     | /     | /      | /      | /    | /       | 153/185  |       | yes*                  |      |                       |     |
|                           | S01 | S01    | 1             | 4/5**   | 0/10* | 0/5   | 0/10* | 3/4** | 3/4**  | 9/10** | 0/5* | 15/23** | 5/5**    | 55/90 |                       | yes* |                       |     |
| Pollen receptors (stigma) | S01 | S07    | 2             | /       | /     | 0/9   | /     | /     | /      | /      | /    | /       | 4/5      |       | yes                   |      |                       |     |
|                           | S01 | S09    | 1             | /       | /     | 0/5   | /     | /     | /      | /      | /    | /       | 5/5      |       | yes                   |      |                       |     |
|                           | S01 | S04    | 3             | /       | /     | 1/10* | /     | /     | 3/10** | /      | /    | /       | 3/5      |       | yes*                  |      |                       |     |
|                           | F1  | S01    | S08           | 2       | /     | /     | 0/9   | /     | /      | /      | /    | /       | /        | NA    | NA                    | yes  |                       |     |
|                           |     | S01    | S10           | 3       | /     | /     | 0/5   | /     | /      | /      | /    | /       | /        | 1/5   |                       | yes  |                       |     |
|                           |     | S01    | S03           | 4       | /     | /     | 0/20  | /     | /      | /      | /    | /       | /        | 13/15 |                       | yes  |                       |     |
|                           |     | S01    | S12           | 1       | /     | /     | 0/5   | /     | /      | /      | /    | /       | /        | 4/5   |                       | yes  |                       |     |
| Controls                  |     |        | 59/65         | 136/164 | 58/85 | 8/10  | 5/5   | 5/5   | NA     | 3/5    | 2/14 | 3/4     |          |       |                       |      |                       |     |
| S-shared vs. Controls     |     |        |               |         |       |       |       |       |        |        |      |         |          |       |                       |      |                       |     |
| Expressed in pollen ?     |     |        | no**          | yes     | yes   | yes   | no**  | no**  | no**   | yes    | no** | no**    |          |       |                       |      |                       |     |

**Figure S1 Summary of cross-pollinations realized for individuals from collection F0 and F1 having S-haplotype S01 (B10-B11).** For each tested cross-pollination between individuals having at least S01 in common (S-shared crosses), pollen donor is shown in line and pollen receptor (stigma) in column. The number of plants having the same genotype used for cross-pollinations is shown next to genotypes. Slash bars indicate that no cross-pollination was realized for the given combination. For realized cross-pollinations, the number of successful pollinations over the number of realized pollinations is indicated. Black cells indicate that most (>70%) of cross-pollinations were unsuccessful. Controls indicate cross-pollinations realized between the tested genotype and all other plants sharing no common S-haplotype with the tested genotype (in grey when the low proportion of successful pollination could result from low pollen efficiency/receptivity). Histograms indicate the proportion of successful cross-pollinations for S-shared crosses totalized by line or column (black; crosses between identical genotypes were not counted) and controls (grey). We considered that S01 was expressed in either pollen (columns) or stigma (lines) when most of combinations gave more than 70% of unsuccessful pollinations. In complex cases, asterisks indicate what combinations of crosses were considered for each diagnostic of expression. Question marks (?) indicate that results were too ambiguous or insufficient to conclude (for instance in cases of recessive haplotypes for which no homozygous was available to test for haplotype expression). In some cases, different individuals with the same genotype gave different results and then the two possible conclusions were indicated. No positive control could be obtained for plants of genotype (S01, S08).

**S02**

|                           |     |        | Pollen donors |       |       |       |       |      |      |       |      |      |       |       |          |                       |                       |
|---------------------------|-----|--------|---------------|-------|-------|-------|-------|------|------|-------|------|------|-------|-------|----------|-----------------------|-----------------------|
|                           |     |        | F0            |       |       |       | F1    |      |      |       |      |      |       |       |          |                       |                       |
| S-haplotypes              |     | 1      | S02           | S02   | S02   | S02   | S02   | S02  | S02  | S02   | S02  | S02  | S02   | S02   | Controls | S-shared vs. Controls | Expressed in stigma ? |
| 1                         | 2   | Plants | 1             | 1     | 1     | 1     | S09   | S04  | S08  | S10   | S03  | S01  | S12   |       |          |                       |                       |
| F0                        | S02 | S07    | 1             | 0/5   | 0/5   | 0/5   | 0/5   | 0/5  | 0/5  | /     | /    | /    | /     | /     | 72/75    |                       | yes                   |
|                           | S02 | S03    | 1             | 0/5   | 0/5   | 0/5   | 0/5   | /    | /    | /     | /    | /    | /     | /     | 51/60    |                       | yes                   |
|                           | S02 | S11    | 1             | 0/5   | 0/5   | 0/5   | 0/5   | /    | /    | /     | /    | /    | /     | /     | 55/65    |                       | yes                   |
|                           | S02 | S01    | 1             | 0/5   | 0/5   | 0/5   | 0/5   | /    | /    | /     | /    | /    | /     | /     | 59/65    |                       | yes                   |
| Pollen receptors (stigma) | S02 | S09    | 3             | 0/5   | /     | /     | /     | /    | /    | /     | 0/60 | /    | /     | 7/14  |          | yes                   |                       |
|                           | S02 | S04    | 3             | 0/5   | /     | /     | /     | /    | /    | /     | 0/20 | 1/44 | /     | 5/5   |          | yes                   |                       |
|                           | S02 | S08    | 2             | /     | /     | /     | /     | /    | /    | 0/20  | /    | /    | /     | 5/5   |          | yes                   |                       |
| F1                        | S02 | S10    | 2             | /     | /     | /     | /     | /    | 0/20 | /     | /    | /    | /     | 23/30 |          | yes                   |                       |
|                           | S02 | S03    | 5             | /     | /     | /     | /     | 0/48 | 0/19 | /     | /    | /    | 1/55  | 11/15 |          | yes                   |                       |
|                           | S02 | S01    | 4             | /     | /     | /     | /     | /    | 1/39 | /     | /    | /    | /     | 8/15  |          | yes                   |                       |
|                           | S02 | S12    | 4             | /     | /     | /     | /     | /    | /    | /     | 0/78 | /    | /     | 7/10  |          | yes                   |                       |
| Controls                  |     |        | 54/73         | 57/60 | 56/70 | 59/65 | 11/15 | 5/5  | 5/5  | 15/18 | 5/10 | 8/19 | 10/10 |       |          |                       |                       |
| S-shared vs. Controls     |     |        |               |       |       |       |       |      |      |       |      |      |       |       |          |                       |                       |
| Expressed in pollen ?     |     |        | yes           | yes   | yes   | yes   | yes   | yes  | yes  | yes   | yes  | yes  | yes   |       |          |                       |                       |

**Figure S2** Summary of cross-pollinations realized for individuals from collection F0 and F1 having S-haplotype S02 (A01-A03). See Figure S1 for legend details.

| S03                       |     |        | Pollen donors |       |       |       |       |       |      |      |      |      |      |       | Controls |          |                       | S-shared vs. Controls | Expressed in stigma ? |
|---------------------------|-----|--------|---------------|-------|-------|-------|-------|-------|------|------|------|------|------|-------|----------|----------|-----------------------|-----------------------|-----------------------|
|                           |     |        | F0            |       |       |       |       | F1    |      |      |      |      |      |       |          |          |                       |                       |                       |
| S-haplotypes              |     | 1      | S03           | S03   | S03   | S03   | S03   | S03   | S03  | S03  | S03  | S03  | S03  | S03   | S03      | Controls | S-shared vs. Controls | Expressed in stigma ? |                       |
| 1                         | 2   | Plants | S02           | S09   | S04   | S08   | S12   | S07   | S02  | S05  | S04  | S01  | S13  |       |          |          |                       |                       |                       |
| F0                        | S03 | S02    | 1             | 0/5   | 0/5*  | 0/5*  | 0/5*  | 0/5*  | /    | /    | /    | /    | /    | /     | 51/60    |          | yes                   |                       |                       |
|                           | S03 | S09    | 1             | 0/5*  | 0/5   | 0/5*  | 1/5*  | 0/5*  | 0/5  | /    | /    | /    | /    | /     | 57/78    |          | yes                   |                       |                       |
|                           | S03 | S04    | 1             | 1/5** | 0/5*  | 0/5   | 1/10* | 0/5*  | 0/4  | /    | /    | /    | /    | /     | 59/70    |          | yes                   |                       |                       |
|                           | S03 | S08    | 1             | 5/5** | 2/5** | 1/5*  | 0/5   | 4/5** | /    | /    | /    | /    | /    | /     | 55/76    |          | yes*/no**             |                       |                       |
|                           | S03 | S12    | 1             | 0/5*  | 0/5*  | 0/5*  | 0/5*  | 0/5   | 0/5  | /    | /    | /    | /    | /     | 60/75    |          | yes                   |                       |                       |
| Pollen receptors (stigma) | S03 | S07    | 2             | /     | 0/5   | 0/4   | /     | /     | /    | 0/5  | /    | /    | /    | /     | 20/22    |          | yes                   |                       |                       |
|                           | S03 | S02    | 4             | /     | /     | /     | /     | /     | 0/5  | /    | /    | /    | 0/35 | /     | 8/10     |          | yes                   |                       |                       |
| F1                        | S03 | S05    | 3             | /     | /     | /     | /     | /     | /    | /    | 0/15 | /    | 0/19 | 8/9   |          | yes      |                       |                       |                       |
|                           | S03 | S04    | 3             | /     | /     | /     | /     | /     | /    | 0/15 | /    | /    | 0/5  | 5/5   |          | yes      |                       |                       |                       |
|                           | S03 | S01    | 4             | /     | /     | /     | /     | /     | 4/33 | /    | /    | /    | /    | 13/15 |          | yes      |                       |                       |                       |
|                           | S03 | S13    | 2             | /     | /     | /     | /     | /     | /    | 1/20 | 0/5  | /    | /    | 9/9   |          | yes      |                       |                       |                       |
| Controls                  |     |        | 57/60         | 67/85 | 57/80 | 59/85 | 65/70 | 19/25 | 4/5  | 7/10 | 8/10 | 2/14 | 8/10 |       |          |          |                       |                       |                       |
| S-shared vs. Controls     |     |        |               |       |       |       |       |       |      |      |      |      |      |       |          |          |                       |                       |                       |
| Expressed in pollen ?     |     |        | yes*          | yes*  | yes*  | yes*  | yes*  | yes   | yes  | yes  | yes  | yes  | yes  | yes   |          |          |                       |                       |                       |

**Figure S3** Summary of cross-pollinations realized for individuals from collection F0 and F1 having S-haplotype S03 (B06). See Figure S1 for legend details.



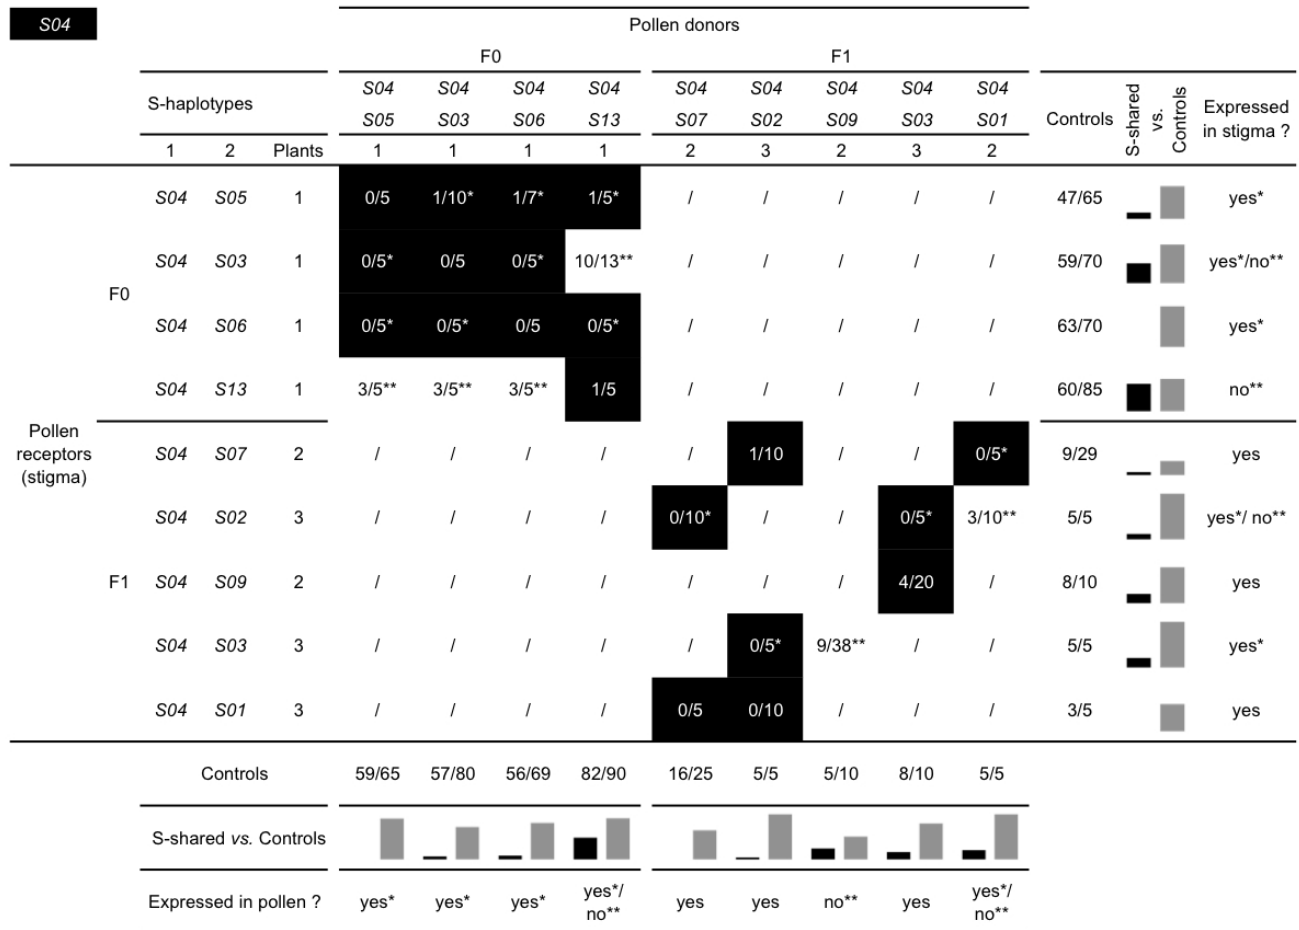

**Figure S4** Summary of cross-pollinations realized for individuals from collection F0 and F1 having S-haplotype S04 (B01-B13). See Figure S1 for legend details.

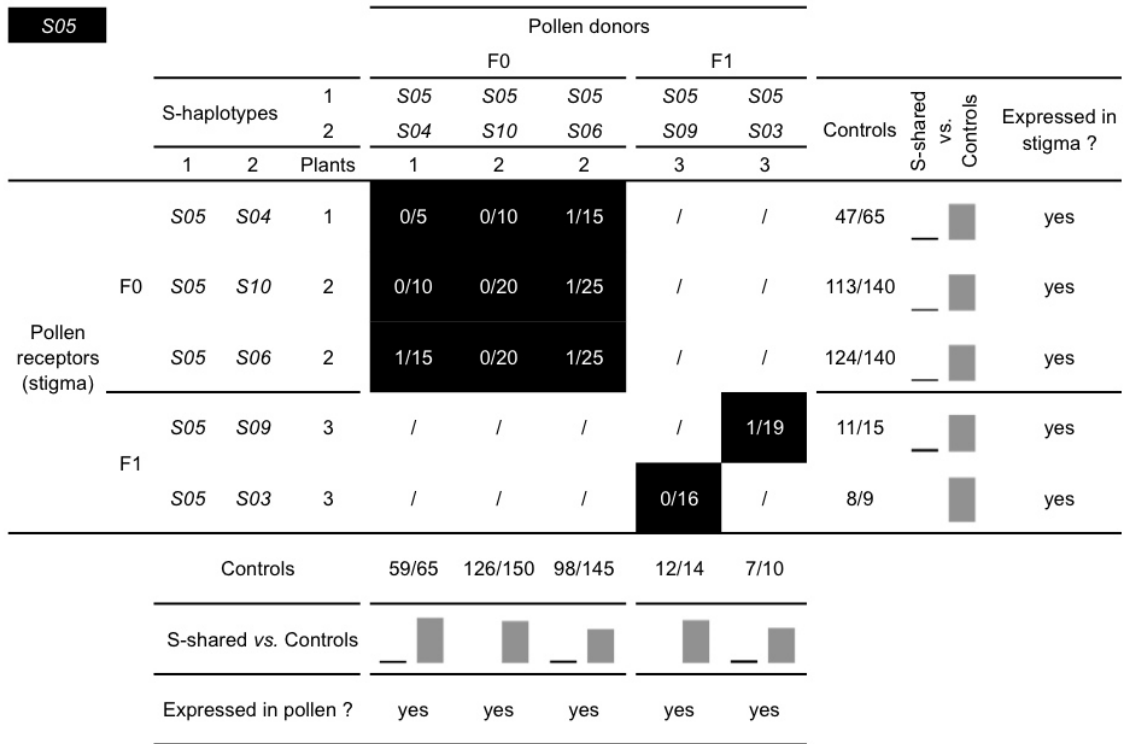

**Figure S5** Summary of cross-pollinations realized for individuals from collection F0 and F1 having S-haplotype S05 (A05). See Figure S1 for legend details.

| S06                       |     |        | Pollen donors |         |           |        | Controls | S-shared vs. Controls | Expressed in stigma ? |      |
|---------------------------|-----|--------|---------------|---------|-----------|--------|----------|-----------------------|-----------------------|------|
|                           |     |        | F0            |         |           |        |          |                       |                       |      |
| S-haplotypes              |     | 1      | S06           | S06     | S06       | S06    | Controls | S-shared vs. Controls | Expressed in stigma ? |      |
| 1                         | 2   | Plants | 1             | 2       | 1         | 1      |          |                       |                       |      |
| Pollen receptors (stigma) | S06 | S07    | 1             | 0/5     | 7/10**    | 5/5**  | 0/5*     | 65/75                 |                       | yes* |
|                           | S06 | S05    | 2             | 10/10** | 1/25      | 9/10** | 0/10*    | 124/140               |                       | yes* |
|                           | S06 | S04    | 1             | 5/5**   | 8/15**    | 0/5    | 0/5*     | 63/70                 |                       | yes* |
|                           | S06 | S06    | 1             | 3/5**   | 5/10**    | 0/5*   | 0/5      | 37/75                 |                       | ?    |
| Controls                  |     |        | 60/80         | 98/145  | 56/69     | 37/48  |          |                       |                       |      |
| S-shared vs. Controls     |     |        |               |         |           |        |          |                       |                       |      |
| Expressed in pollen ?     |     |        | no**          | no**    | yes*/no** | yes*   |          |                       |                       |      |

**Figure S6** Summary of cross-pollinations realized for individuals from collection F0 and F1 having S-haplotype S06 (B04-C01). See Figure S1 for legend details.

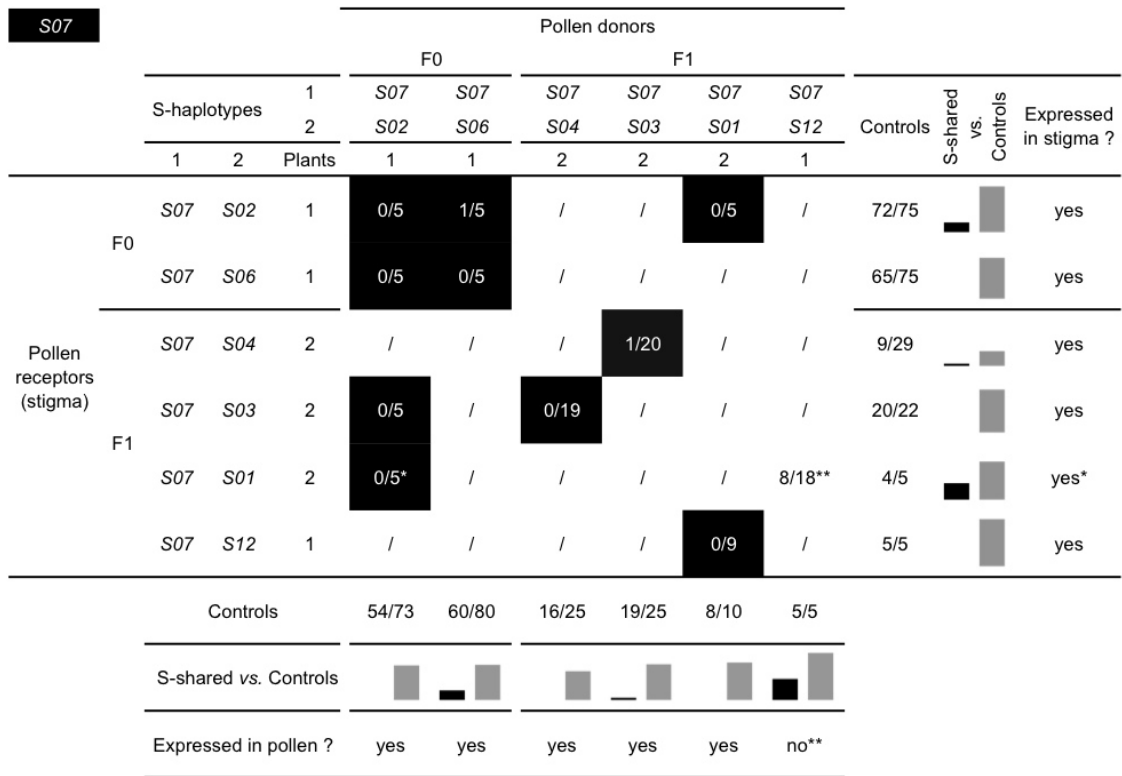

**Figure S7** Summary of cross-pollinations realized for individuals from collection F0 and F1 having S-haplotype S07 (A01-A02). See Figure S1 for legend details.

| S-haplotypes              |    |         | Pollen donors |       |     |      | Controls | S-shared vs. Controls | Expressed in stigma ? |     |
|---------------------------|----|---------|---------------|-------|-----|------|----------|-----------------------|-----------------------|-----|
|                           |    |         | F0            |       | F1  |      |          |                       |                       |     |
| 1                         | 2  | Plants  | 1             | 1     | 2   | 2    |          |                       |                       |     |
| Pollen receptors (stigma) | F0 | S08 S10 | 1             | 0/5   | 0/5 | /    | /        | 78/90                 |                       | yes |
|                           |    | S08 S03 | 1             | 0/5   | 0/5 | /    | /        | 55/76                 |                       | yes |
|                           | F1 | S08 S02 | 2             | /     | /   | /    | 0/19     | 5/5                   |                       | yes |
|                           |    | S08 S01 | 2             | /     | /   | 1/15 | /        | /                     |                       | yes |
| Controls                  |    |         | 77/95         | 59/85 | 5/5 | /    |          |                       |                       |     |
| S-shared vs. Controls     |    |         |               |       |     |      | /        |                       |                       |     |
| Expressed in pollen ?     |    |         | yes           | yes   | yes | yes  |          |                       |                       |     |

**Figure S8** Summary of cross-pollinations realized for individuals from collection F0 and F1 having S-haplotype *S08* (*B03*). See Figure S1 for legend details. No positive control could be obtained for plants of genotype (*S01,S08*).

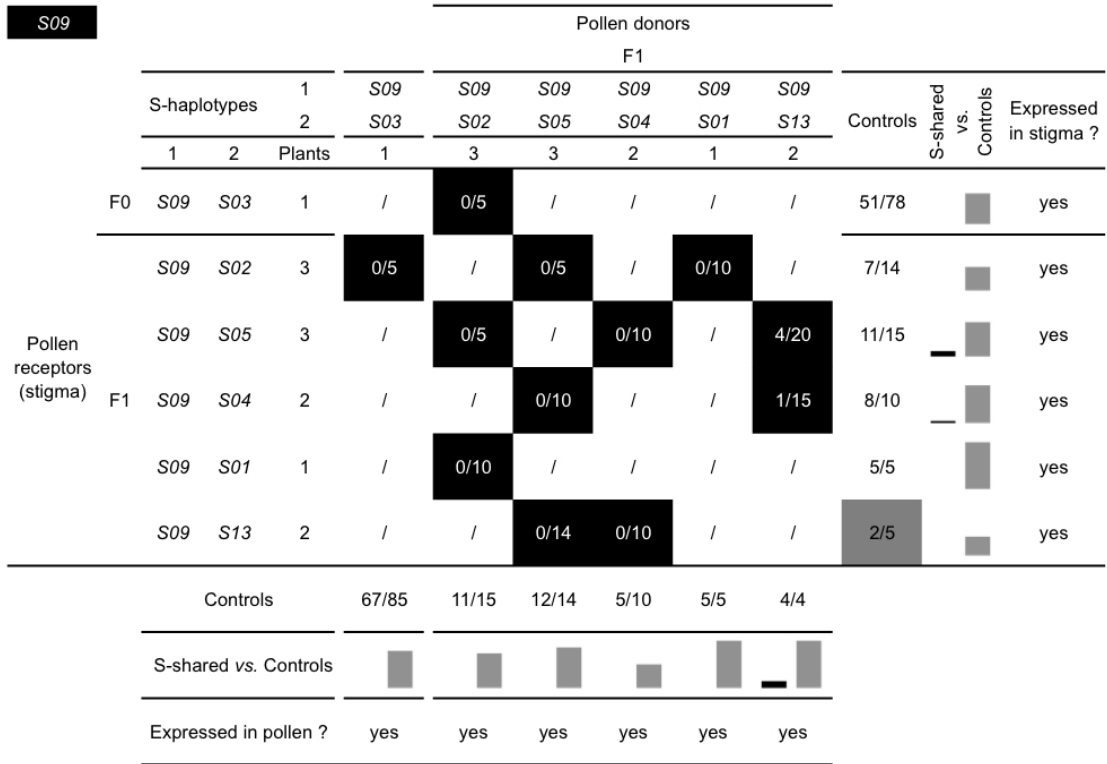

**Figure S9** Summary of cross-pollinations realized for individuals from collection F0 and F1 having S-haplotype S09 (A06-A07). See Figure S1 for legend details.

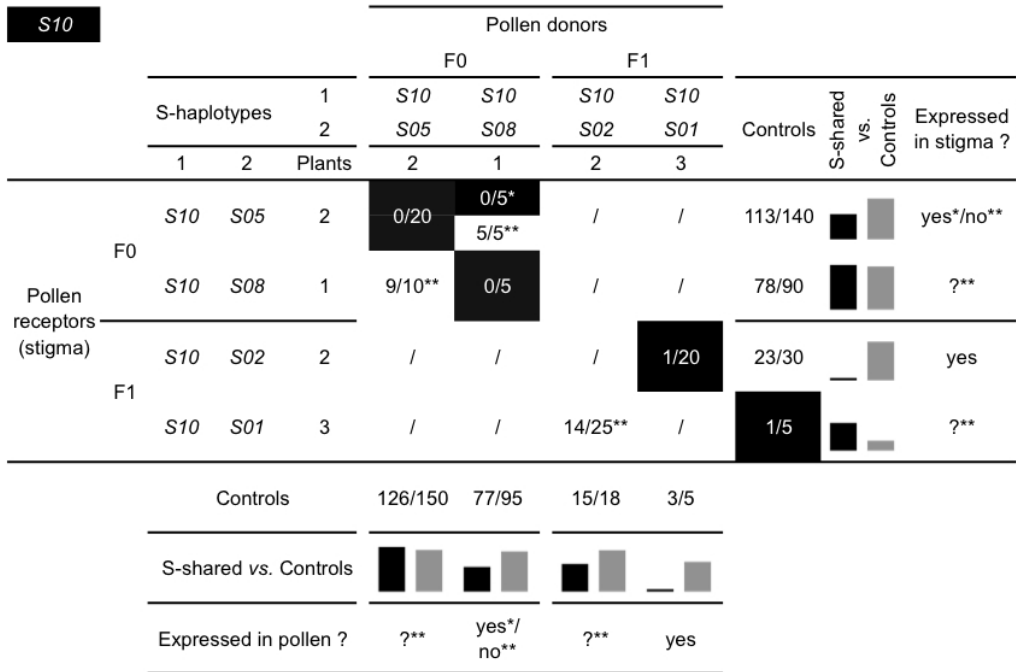

**Figure S10** Summary of cross-pollinations realized for individuals from collection F0 and F1 having *S*-haplotype *S10* (*B05*). See Figure S1 for legend details.

| S11                       |     |        | Pollen donors |       |      |        | Controls | S-shared vs. Controls | Expressed in stigma ? |
|---------------------------|-----|--------|---------------|-------|------|--------|----------|-----------------------|-----------------------|
|                           |     |        | F0            |       |      |        |          |                       |                       |
| S-haplotypes              |     | 1      | S11           | S11   |      |        |          |                       |                       |
|                           |     | 2      | S02           | S01   |      |        |          |                       |                       |
|                           |     | Plants | 1             | 2     |      |        |          |                       |                       |
| Pollen receptors (stigma) | S11 | S02    | 1             | 0/5   | 4/5* | 55/65  |          | ?                     |                       |
|                           | S11 | S01    | 2             | 5/5** | 0/5  | 82/110 |          | ?                     |                       |
| Controls                  |     |        | 56/70         | 68/85 |      |        |          |                       |                       |
| S-shared vs. Controls     |     |        |               |       |      |        |          |                       |                       |
| Expressed in pollen ?     |     |        | ?             | ?     |      |        |          |                       |                       |

**Figure S11** Summary of cross-pollinations realized for individuals from collection F0 and F1 having S-haplotype S11 (B09-B12). See Figure S1 for legend details.



|                           |    |            | Pollen donors |                                                                                                                                                                     |                                                                                   | Controls | S-shared vs. Controls                                                                                                                                                  | Expressed in stigma ? |
|---------------------------|----|------------|---------------|---------------------------------------------------------------------------------------------------------------------------------------------------------------------|-----------------------------------------------------------------------------------|----------|------------------------------------------------------------------------------------------------------------------------------------------------------------------------|-----------------------|
|                           |    |            | F1            |                                                                                                                                                                     |                                                                                   |          |                                                                                                                                                                        |                       |
| S-haplotypes              | 1  |            | <i>S12</i>    | <i>S12</i>                                                                                                                                                          | <i>S12</i>                                                                        |          |                                                                                                                                                                        |                       |
|                           | 2  |            | <i>S07</i>    | <i>S02</i>                                                                                                                                                          | <i>S01</i>                                                                        |          |                                                                                                                                                                        |                       |
| Plants                    |    |            | 1             | 4                                                                                                                                                                   | 1                                                                                 |          |                                                                                                                                                                        |                       |
| Pollen receptors (stigma) |    | <i>S12</i> | <i>S07</i>    | 1                                                                                                                                                                   | 5/5                                                                               | NA       | NA                                                                                                                                                                     | ?                     |
|                           | F1 | <i>S12</i> | <i>S02</i>    | 4                                                                                                                                                                   | 5/5                                                                               | 7/10     |                                                                                     | yes*                  |
|                           |    | <i>S12</i> | <i>S01</i>    | 1                                                                                                                                                                   | 5/5                                                                               | 4/5      |   | ?                     |
| Controls                  |    |            | NA            | 10/10                                                                                                                                                               | 3/4                                                                               |          |                                                                                                                                                                        |                       |
| S-shared vs. Controls     |    |            | NA            |   |  |          |                                                                                                                                                                        |                       |
| Expressed in pollen ?     |    |            | ?             | ?                                                                                                                                                                   | yes*                                                                              |          |                                                                                                                                                                        |                       |

**Figure S12** Summary of cross-pollinations realized for individuals from collection F0 and F1 having *S*-haplotype *S12* (*B17*-*B18*). See Figure S1 for legend details.

Haplotype *S12* was not typed in collection F1 because of no available specific primers for *B17* or *B18*. The presence of *S12* in collection F1 was thus deduced from the segregation pattern in offspring of individual 9 of (genotype *S03-S12*; see Figure 3 and Table 3). In collection F1, we thus considered that *S12* was present when *S03* (*B06*) was absent.

| S13                          |     |        | Pollen donors                                                                     |                                                                                   |          |                       |                                                                                   |     |
|------------------------------|-----|--------|-----------------------------------------------------------------------------------|-----------------------------------------------------------------------------------|----------|-----------------------|-----------------------------------------------------------------------------------|-----|
|                              |     |        | F1                                                                                |                                                                                   |          |                       | Controls                                                                          |     |
| S-haplotypes                 |     | 1      | S13                                                                               | S13                                                                               | Controls | S-shared vs. Controls | Expressed in stigma ?                                                             |     |
| 1                            | 2   | Plants | S09                                                                               | S03                                                                               |          |                       |                                                                                   |     |
|                              |     | 2      | 2                                                                                 |                                                                                   |          |                       |                                                                                   |     |
| Pollen receptors F1 (stigma) | S13 | S09    | 2                                                                                 | /                                                                                 | 0/20     | 2/5                   |  | yes |
|                              | S13 | S03    | 2                                                                                 | 0/20                                                                              | /        | 9/9                   |  | yes |
| Controls                     |     |        | 4/4                                                                               | 8/10                                                                              |          |                       |                                                                                   |     |
| S-shared vs. Controls        |     |        |  |  |          |                       |                                                                                   |     |
| Expressed in pollen ?        |     |        | yes                                                                               | yes                                                                               |          |                       |                                                                                   |     |

**Figure S13** Summary of cross-pollinations realized for individuals from collection F0 and F1 having S-haplotype S13 (A04).

| <b>S02 vs. S07</b>        |            |            |            | Pollen donors |            |            |            |            |            |            |            |            |            |            |            |      |
|---------------------------|------------|------------|------------|---------------|------------|------------|------------|------------|------------|------------|------------|------------|------------|------------|------------|------|
|                           |            |            |            | F0            |            |            |            |            | F1         |            |            |            |            |            |            |      |
| S-haplotypes              |            | 1          | <b>S02</b> | <b>S07</b>    | <b>S07</b> | <b>S07</b> | <b>S07</b> | <b>S07</b> | <b>S02</b> | <b>S02</b> | <b>S02</b> | <b>S02</b> | <b>S02</b> | <b>S02</b> | <b>S02</b> |      |
|                           |            | 2          | <b>S07</b> | S04**         | S03*       | S01        | S12***     | S03*       | S01        | S09        | S04**      | S08        | S10        | S12        |            |      |
| 1                         | 2          | Plants     | 1          | 2             | 2          | 2          | 1          | 5          | 4          | 3          | 3          | 2          | 2          | 4          |            |      |
| F0                        | <b>S02</b> | <b>S07</b> | 1          | /             | /          | /          | 0/5        | /          | /          | /          | 0/5        | 0/5        | /          | /          | /          |      |
|                           | <b>S07</b> | S04**      | 2          | /             | /          | 1/20       | /          | /          | 1/5        | 8/19       | /          | 1/10**     | /          | /          | /          |      |
|                           | <b>S07</b> | S03*       | 2          | 0/5           | 0/19       | /          | /          | /          | 0/5*       | /          | /          | 5/5        | /          | 7/8        | 5/5        |      |
|                           | <b>S07</b> | S01        | 2          | 0/5           | /          | /          | /          | 8/18***    | 4/5        | /          | /          | /          | /          | /          | /          |      |
|                           | <b>S07</b> | S12        | 1          | /             | /          | /          | 0/9        | /          | /          | /          | /          | /          | /          | /          | 5/5        |      |
| Pollen receptors (stigma) | F1         | <b>S02</b> | S03*       | 5             | /          | 3/5        | 0/5*       | 8/10       | /          | /          | /          | 0/48       | 0/19       | /          | /          | 1/55 |
|                           |            | <b>S02</b> | S01        | 4             | /          | 8/15       | /          | /          | /          | /          | /          | /          | 1/39       | /          | /          | /    |
|                           |            | <b>S02</b> | S09        | 3             | 0/5        | /          | /          | /          | /          | 0/60       | /          | /          | /          | /          | /          | /    |
|                           |            | <b>S02</b> | S04**      | 3             | 0/5        | 0/10**     | 5/5        | /          | /          | 0/20       | 1/44       | /          | /          | /          | /          | /    |
|                           |            | <b>S02</b> | S08        | 2             | /          | /          | /          | /          | /          | /          | /          | /          | /          | /          | 0/20       | /    |
|                           |            | <b>S02</b> | S10        | 2             | /          | /          | 8/10       | /          | /          | /          | /          | /          | 0/20       | /          | /          | /    |
|                           |            | <b>S02</b> | S12        | 4             | /          | /          | 2/5        | /          | 5/5        | 0/78       | /          | /          | /          | /          | /          | /    |

**Figure S14** Cross-pollinations between plants having haplotype S02 and plants having haplotype S07 are mostly successful, indicating that S02 and S07 are distinct functional S-haplotypes, while sharing sequence A01 in common. See Figure S1 for legend details.
