# Supplementary material for: Self-Incompatibility in Brassicaceae: Identification and Characterization of SRK-Like Sequences Linked to the S-Locus in the Tribe Biscutelleae
Source: PubMed Central journal article supplement (PMC4065267; doi:10.1534/g3.114.010843), 2013-12-23
Supplement: supp_4.6.983_FigureS2.pdf [file supp_4.6.983_FigureS2.pdf]

**S02**

|                           |     |        | Pollen donors |       |       |       |       |      |      |       |      |      |       |       |          |                       |                       |
|---------------------------|-----|--------|---------------|-------|-------|-------|-------|------|------|-------|------|------|-------|-------|----------|-----------------------|-----------------------|
|                           |     |        | F0            |       |       |       | F1    |      |      |       |      |      |       |       |          |                       |                       |
| S-haplotypes              |     | 1      | S02           | S02   | S02   | S02   | S02   | S02  | S02  | S02   | S02  | S02  | S02   | S02   | Controls | S-shared vs. Controls | Expressed in stigma ? |
| 1                         | 2   | Plants | 1             | 1     | 1     | 1     | S09   | S04  | S08  | S10   | S03  | S01  | S12   |       |          |                       |                       |
| F0                        | S02 | S07    | 1             | 0/5   | 0/5   | 0/5   | 0/5   | 0/5  | 0/5  | /     | /    | /    | /     | /     | 72/75    |                       | yes                   |
|                           | S02 | S03    | 1             | 0/5   | 0/5   | 0/5   | 0/5   | /    | /    | /     | /    | /    | /     | /     | 51/60    |                       | yes                   |
|                           | S02 | S11    | 1             | 0/5   | 0/5   | 0/5   | 0/5   | /    | /    | /     | /    | /    | /     | /     | 55/65    |                       | yes                   |
|                           | S02 | S01    | 1             | 0/5   | 0/5   | 0/5   | 0/5   | /    | /    | /     | /    | /    | /     | /     | 59/65    |                       | yes                   |
| Pollen receptors (stigma) | S02 | S09    | 3             | 0/5   | /     | /     | /     | /    | /    | /     | 0/60 | /    | /     | 7/14  |          | yes                   |                       |
|                           | S02 | S04    | 3             | 0/5   | /     | /     | /     | /    | /    | /     | 0/20 | 1/44 | /     | 5/5   |          | yes                   |                       |
|                           | S02 | S08    | 2             | /     | /     | /     | /     | /    | /    | 0/20  | /    | /    | /     | 5/5   |          | yes                   |                       |
| F1                        | S02 | S10    | 2             | /     | /     | /     | /     | /    | 0/20 | /     | /    | /    | /     | 23/30 |          | yes                   |                       |
|                           | S02 | S03    | 5             | /     | /     | /     | /     | 0/48 | 0/19 | /     | /    | /    | 1/55  | 11/15 |          | yes                   |                       |
|                           | S02 | S01    | 4             | /     | /     | /     | /     | /    | 1/39 | /     | /    | /    | /     | 8/15  |          | yes                   |                       |
|                           | S02 | S12    | 4             | /     | /     | /     | /     | /    | /    | /     | 0/78 | /    | /     | 7/10  |          | yes                   |                       |
| Controls                  |     |        | 54/73         | 57/60 | 56/70 | 59/65 | 11/15 | 5/5  | 5/5  | 15/18 | 5/10 | 8/19 | 10/10 |       |          |                       |                       |
| S-shared vs. Controls     |     |        |               |       |       |       |       |      |      |       |      |      |       |       |          |                       |                       |
| Expressed in pollen ?     |     |        | yes           | yes   | yes   | yes   | yes   | yes  | yes  | yes   | yes  | yes  | yes   |       |          |                       |                       |

**Figure S2** Summary of cross-pollinations realized for individuals from collection F0 and F1 having S-haplotype S02 (A01-A03). See Figure S1 for legend details.
