# Supplementary material for: Self-Incompatibility in Brassicaceae: Identification and Characterization of SRK-Like Sequences Linked to the S-Locus in the Tribe Biscutelleae
Source: PubMed Central journal article supplement (PMC4065267; doi:10.1534/g3.114.010843), 2013-12-23
Supplement: supp_4.6.983_FigureS3.pdf [file supp_4.6.983_FigureS3.pdf]

| S03                       |     |        | Pollen donors |       |       |       |       |       |     |      |      |      |      |      | Controls |     |       | S-shared vs. Controls |                       | Expressed in stigma ? |
|---------------------------|-----|--------|---------------|-------|-------|-------|-------|-------|-----|------|------|------|------|------|----------|-----|-------|-----------------------|-----------------------|-----------------------|
|                           |     |        | F0            |       |       |       |       | F1    |     |      |      |      |      |      |          |     |       |                       |                       |                       |
| S-haplotypes              |     | 1      | S03           | S03   | S03   | S03   | S03   | S03   | S03 | S03  | S03  | S03  | S03  | S03  | S03      | S03 | S03   | Controls              | S-shared vs. Controls | Expressed in stigma ? |
| 1                         | 2   | Plants | 1             | 1     | 1     | 1     | 1     | 2     | 4   | 3    | 3    | 4    | 2    |      |          |     |       |                       |                       |                       |
| F0                        | S03 | S02    | 1             | 0/5   | 0/5*  | 0/5*  | 0/5*  | 0/5*  | /   | /    | /    | /    | /    | /    | /        | /   | 51/60 |                       | yes                   |                       |
|                           | S03 | S09    | 1             | 0/5*  | 0/5   | 0/5*  | 1/5*  | 0/5*  | 0/5 | /    | /    | /    | /    | /    | /        | /   | 57/78 |                       | yes                   |                       |
|                           | S03 | S04    | 1             | 1/5** | 0/5*  | 0/5   | 1/10* | 0/5*  | 0/4 | /    | /    | /    | /    | /    | /        | /   | 59/70 |                       | yes                   |                       |
|                           | S03 | S08    | 1             | 5/5** | 2/5** | 1/5*  | 0/5   | 4/5** | /   | /    | /    | /    | /    | /    | /        | /   | 55/76 |                       | yes*/no**             |                       |
|                           | S03 | S12    | 1             | 0/5*  | 0/5*  | 0/5*  | 0/5*  | 0/5   | 0/5 | /    | /    | /    | /    | /    | /        | /   | 60/75 |                       | yes                   |                       |
| Pollen receptors (stigma) | S03 | S07    | 2             | /     | 0/5   | 0/4   | /     | /     | /   | 0/5  | /    | /    | /    | /    | /        | /   | 20/22 |                       | yes                   |                       |
|                           | S03 | S02    | 4             | /     | /     | /     | /     | /     | 0/5 | /    | /    | /    | 0/35 | /    | /        | /   | 8/10  |                       | yes                   |                       |
| F1                        | S03 | S05    | 3             | /     | /     | /     | /     | /     | /   | /    | /    | 0/15 | /    | 0/19 | /        | /   | 8/9   |                       | yes                   |                       |
|                           | S03 | S04    | 3             | /     | /     | /     | /     | /     | /   | /    | 0/15 | /    | /    | 0/5  | /        | /   | 5/5   |                       | yes                   |                       |
|                           | S03 | S01    | 4             | /     | /     | /     | /     | /     | /   | 4/33 | /    | /    | /    | /    | /        | /   | 13/15 |                       | yes                   |                       |
|                           | S03 | S13    | 2             | /     | /     | /     | /     | /     | /   | /    | 1/20 | 0/5  | /    | /    | /        | /   | 9/9   |                       | yes                   |                       |
| Controls                  |     |        | 57/60         | 67/85 | 57/80 | 59/85 | 65/70 | 19/25 | 4/5 | 7/10 | 8/10 | 2/14 | 8/10 |      |          |     |       |                       |                       |                       |
| S-shared vs. Controls     |     |        |               |       |       |       |       |       |     |      |      |      |      |      |          |     |       |                       |                       |                       |
| Expressed in pollen ?     |     |        | yes*          | yes*  | yes*  | yes*  | yes*  | yes   | yes | yes  | yes  | yes  | yes  | yes  |          |     |       |                       |                       |                       |

**Figure S3** Summary of cross-pollinations realized for individuals from collection F0 and F1 having S-haplotype S03 (B06). See Figure S1 for legend details.
