# Supplementary material for: Self-Incompatibility in Brassicaceae: Identification and Characterization of SRK-Like Sequences Linked to the S-Locus in the Tribe Biscutelleae
Source: PubMed Central journal article supplement (PMC4065267; doi:10.1534/g3.114.010843), 2013-12-23
Supplement: supp_4.6.983_FigureS5.pdf [file supp_4.6.983_FigureS5.pdf]

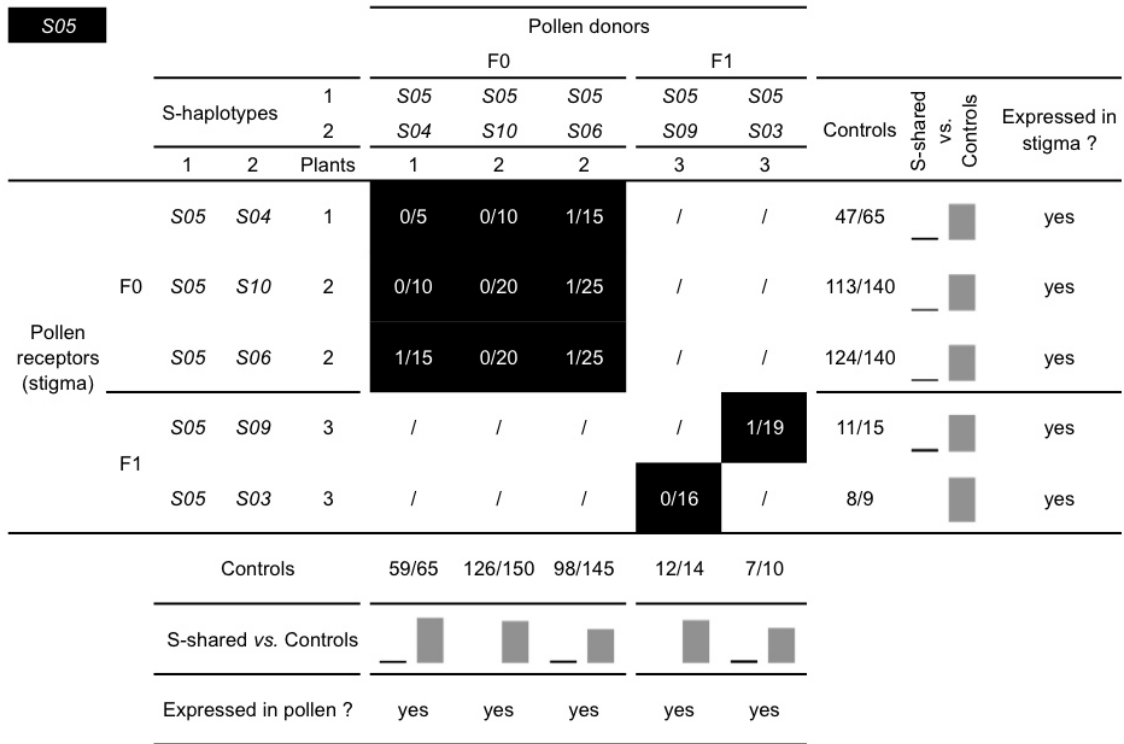

**Figure S5** Summary of cross-pollinations realized for individuals from collection F0 and F1 having S-haplotype S05 (A05). See Figure S1 for legend details.
