# Supplementary material for: Self-Incompatibility in Brassicaceae: Identification and Characterization of SRK-Like Sequences Linked to the S-Locus in the Tribe Biscutelleae
Source: PubMed Central journal article supplement (PMC4065267; doi:10.1534/g3.114.010843), 2013-12-23
Supplement: supp_4.6.983_FigureS6.pdf [file supp_4.6.983_FigureS6.pdf]

| S06                       |     |        | Pollen donors |         |           |        | Controls |                       |                       | S-shared vs. Controls | Expressed in stigma ? |
|---------------------------|-----|--------|---------------|---------|-----------|--------|----------|-----------------------|-----------------------|-----------------------|-----------------------|
|                           |     |        | F0            |         |           |        |          |                       |                       |                       |                       |
| S-haplotypes              |     | 1      | S06           | S06     | S06       | S06    | Controls | S-shared vs. Controls | Expressed in stigma ? |                       |                       |
| 1                         | 2   | Plants | 1             | 2       | 1         | 1      |          |                       |                       |                       |                       |
| Pollen receptors (stigma) | S06 | S07    | 1             | 0/5     | 7/10**    | 5/5**  | 0/5*     | 65/75                 |                       | yes*                  |                       |
|                           | S06 | S05    | 2             | 10/10** | 1/25      | 9/10** | 0/10*    | 124/140               |                       | yes*                  |                       |
|                           | S06 | S04    | 1             | 5/5**   | 8/15**    | 0/5    | 0/5*     | 63/70                 |                       | yes*                  |                       |
|                           | S06 | S06    | 1             | 3/5**   | 5/10**    | 0/5*   | 0/5      | 37/75                 |                       | ?                     |                       |
| Controls                  |     |        | 60/80         | 98/145  | 56/69     | 37/48  |          |                       |                       |                       |                       |
| S-shared vs. Controls     |     |        |               |         |           |        |          |                       |                       |                       |                       |
| Expressed in pollen ?     |     |        | no**          | no**    | yes*/no** | yes*   |          |                       |                       |                       |                       |

**Figure S6** Summary of cross-pollinations realized for individuals from collection F0 and F1 having S-haplotype S06 (B04-C01). See Figure S1 for legend details.
