# Supplementary material for: Self-Incompatibility in Brassicaceae: Identification and Characterization of SRK-Like Sequences Linked to the S-Locus in the Tribe Biscutelleae
Source: PubMed Central journal article supplement (PMC4065267; doi:10.1534/g3.114.010843), 2013-12-23
Supplement: supp_4.6.983_FigureS8.pdf [file supp_4.6.983_FigureS8.pdf]

| S-haplotypes              |    |                       | Pollen donors |       |     |      | Controls | S-shared vs. Controls | Expressed in stigma ? |     |
|---------------------------|----|-----------------------|---------------|-------|-----|------|----------|-----------------------|-----------------------|-----|
|                           |    |                       | F0            |       | F1  |      |          |                       |                       |     |
| 1                         | 2  | Plants                | 1             | 1     | 2   | 2    |          |                       |                       |     |
| Pollen receptors (stigma) | F0 | <i>S08</i> <i>S10</i> | 1             | 0/5   | 0/5 | /    | /        | 78/90                 |                       | yes |
|                           |    | <i>S08</i> <i>S03</i> | 1             | 0/5   | 0/5 | /    | /        | 55/76                 |                       | yes |
|                           | F1 | <i>S08</i> <i>S02</i> | 2             | /     | /   | /    | 0/19     | 5/5                   |                       | yes |
|                           |    | <i>S08</i> <i>S01</i> | 2             | /     | /   | 1/15 | /        | /                     |                       | yes |
| Controls                  |    |                       | 77/95         | 59/85 | 5/5 | /    |          |                       |                       |     |
| S-shared vs. Controls     |    |                       |               |       |     |      | /        |                       |                       |     |
| Expressed in pollen ?     |    |                       | yes           | yes   | yes | yes  |          |                       |                       |     |

**Figure S8** Summary of cross-pollinations realized for individuals from collection F0 and F1 having S-haplotype *S08* (*B03*). See Figure S1 for legend details. No positive control could be obtained for plants of genotype (*S01,S08*).
