# Supplementary material for: Self-Incompatibility in Brassicaceae: Identification and Characterization of SRK-Like Sequences Linked to the S-Locus in the Tribe Biscutelleae
Source: PubMed Central journal article supplement (PMC4065267; doi:10.1534/g3.114.010843), 2013-12-23
Supplement: supp_4.6.983_FigureS11.pdf [file supp_4.6.983_FigureS11.pdf]

|                           |     |        | Pollen donors |       |      |        | Controls | S-shared vs. Controls | Expressed in stigma ? |
|---------------------------|-----|--------|---------------|-------|------|--------|----------|-----------------------|-----------------------|
|                           |     |        | F0            |       |      |        |          |                       |                       |
| S-haplotypes              |     | 1      | S11           | S11   |      |        |          |                       |                       |
|                           |     | 2      | S02           | S01   |      |        |          |                       |                       |
|                           |     | Plants | 1             | 2     |      |        |          |                       |                       |
| Pollen receptors (stigma) | S11 | S02    | 1             | 0/5   | 4/5* | 55/65  |          | ?                     |                       |
|                           | S11 | S01    | 2             | 5/5** | 0/5  | 82/110 |          | ?                     |                       |
| Controls                  |     |        | 56/70         | 68/85 |      |        |          |                       |                       |
| S-shared vs. Controls     |     |        |               |       |      |        |          |                       |                       |
| Expressed in pollen ?     |     |        | ?             | ?     |      |        |          |                       |                       |

**Figure S11** Summary of cross-pollinations realized for individuals from collection F0 and F1 having S-haplotype S11 (B09-B12). See Figure S1 for legend details.
