# Supplementary material for: Self-Incompatibility in Brassicaceae: Identification and Characterization of SRK-Like Sequences Linked to the S-Locus in the Tribe Biscutelleae
Source: PubMed Central journal article supplement (PMC4065267; doi:10.1534/g3.114.010843), 2013-12-23
Supplement: supp_4.6.983_FigureS12.pdf [file supp_4.6.983_FigureS12.pdf]

|                           |    |            | Pollen donors |                                                                                                                                                                     |                                                                                   | Controls | S-shared vs. Controls                                                                                                                                                  | Expressed in stigma ? |
|---------------------------|----|------------|---------------|---------------------------------------------------------------------------------------------------------------------------------------------------------------------|-----------------------------------------------------------------------------------|----------|------------------------------------------------------------------------------------------------------------------------------------------------------------------------|-----------------------|
|                           |    |            | F1            |                                                                                                                                                                     |                                                                                   |          |                                                                                                                                                                        |                       |
| S-haplotypes              | 1  |            | <i>S12</i>    | <i>S12</i>                                                                                                                                                          | <i>S12</i>                                                                        |          |                                                                                                                                                                        |                       |
|                           | 2  |            | <i>S07</i>    | <i>S02</i>                                                                                                                                                          | <i>S01</i>                                                                        |          |                                                                                                                                                                        |                       |
| Plants                    |    |            | 1             | 4                                                                                                                                                                   | 1                                                                                 |          |                                                                                                                                                                        |                       |
| Pollen receptors (stigma) |    | <i>S12</i> | <i>S07</i>    | 1                                                                                                                                                                   | 5/5                                                                               | NA       | NA                                                                                                                                                                     | ?                     |
|                           | F1 | <i>S12</i> | <i>S02</i>    | 4                                                                                                                                                                   | 5/5                                                                               | 7/10     |                                                                                     | yes*                  |
|                           |    | <i>S12</i> | <i>S01</i>    | 1                                                                                                                                                                   | 5/5                                                                               | 4/5      |   | ?                     |
| Controls                  |    |            | NA            | 10/10                                                                                                                                                               | 3/4                                                                               |          |                                                                                                                                                                        |                       |
| S-shared vs. Controls     |    |            | NA            |   |  |          |                                                                                                                                                                        |                       |
| Expressed in pollen ?     |    |            | ?             | ?                                                                                                                                                                   | yes*                                                                              |          |                                                                                                                                                                        |                       |

**Figure S12** Summary of cross-pollinations realized for individuals from collection F0 and F1 having *S*-haplotype *S12* (*B17*-*B18*). See Figure S1 for legend details.

Haplotype *S12* was not typed in collection F1 because of no available specific primers for *B17* or *B18*. The presence of *S12* in collection F1 was thus deduced from the segregation pattern in offspring of individual 9 of (genotype *S03-S12*; see Figure 3 and Table 3). In collection F1, we thus considered that *S12* was present when *S03* (*B06*) was absent.
