# Supplementary material for: Self-Incompatibility in Brassicaceae: Identification and Characterization of SRK-Like Sequences Linked to the S-Locus in the Tribe Biscutelleae
Source: PubMed Central journal article supplement (PMC4065267; doi:10.1534/g3.114.010843), 2013-12-23
Supplement: supp_4.6.983_FigureS13.pdf [file supp_4.6.983_FigureS13.pdf]

| S13                          |     |        | Pollen donors                                                                     |                                                                                   |          |                       |                                                                                   |     |
|------------------------------|-----|--------|-----------------------------------------------------------------------------------|-----------------------------------------------------------------------------------|----------|-----------------------|-----------------------------------------------------------------------------------|-----|
|                              |     |        | F1                                                                                |                                                                                   |          |                       | Controls                                                                          |     |
| S-haplotypes                 |     | 1      | S13                                                                               | S13                                                                               | Controls | S-shared vs. Controls | Expressed in stigma ?                                                             |     |
| 1                            | 2   | Plants | S09                                                                               | S03                                                                               |          |                       |                                                                                   |     |
|                              |     | 2      | 2                                                                                 |                                                                                   |          |                       |                                                                                   |     |
| Pollen receptors F1 (stigma) | S13 | S09    | 2                                                                                 | /                                                                                 | 0/20     | 2/5                   |  | yes |
|                              | S13 | S03    | 2                                                                                 | 0/20                                                                              | /        | 9/9                   |  | yes |
| Controls                     |     |        | 4/4                                                                               | 8/10                                                                              |          |                       |                                                                                   |     |
| S-shared vs. Controls        |     |        |  |  |          |                       |                                                                                   |     |
| Expressed in pollen ?        |     |        | yes                                                                               | yes                                                                               |          |                       |                                                                                   |     |

**Figure S13** Summary of cross-pollinations realized for individuals from collection F0 and F1 having S-haplotype S13 (A04).
