# Supplementary material for: Self-Incompatibility in Brassicaceae: Identification and Characterization of SRK-Like Sequences Linked to the S-Locus in the Tribe Biscutelleae
Source: PubMed Central journal article supplement (PMC4065267; doi:10.1534/g3.114.010843), 2013-12-23
Supplement: supp_4.6.983_FigureS14.pdf [file supp_4.6.983_FigureS14.pdf]

| <b>S02 vs. S07</b>        |            |            |            | Pollen donors |            |            |            |            |            |            |            |            |            |            |            |      |
|---------------------------|------------|------------|------------|---------------|------------|------------|------------|------------|------------|------------|------------|------------|------------|------------|------------|------|
|                           |            |            |            | F0            |            |            |            |            | F1         |            |            |            |            |            |            |      |
| S-haplotypes              |            | 1          | <b>S02</b> | <b>S07</b>    | <b>S07</b> | <b>S07</b> | <b>S07</b> | <b>S07</b> | <b>S02</b> | <b>S02</b> | <b>S02</b> | <b>S02</b> | <b>S02</b> | <b>S02</b> | <b>S02</b> |      |
|                           |            | 2          | <b>S07</b> | S04**         | S03*       | S01        | S12***     | S03*       | S01        | S09        | S04**      | S08        | S10        | S12        |            |      |
| 1                         | 2          | Plants     | 1          | 2             | 2          | 2          | 1          | 5          | 4          | 3          | 3          | 2          | 2          | 4          |            |      |
| F0                        | <b>S02</b> | <b>S07</b> | 1          | /             | /          | /          | 0/5        | /          | /          | /          | 0/5        | 0/5        | /          | /          | /          |      |
|                           | <b>S07</b> | S04**      | 2          | /             | /          | 1/20       | /          | /          | 1/5        | 8/19       | /          | 1/10**     | /          | /          | /          |      |
|                           | <b>S07</b> | S03*       | 2          | 0/5           | 0/19       | /          | /          | /          | 0/5*       | /          | /          | 5/5        | /          | 7/8        | 5/5        |      |
|                           | <b>S07</b> | S01        | 2          | 0/5           | /          | /          | /          | 8/18***    | 4/5        | /          | /          | /          | /          | /          | /          |      |
|                           | <b>S07</b> | S12        | 1          | /             | /          | /          | 0/9        | /          | /          | /          | /          | /          | /          | /          | 5/5        |      |
| Pollen receptors (stigma) | F1         | <b>S02</b> | S03*       | 5             | /          | 3/5        | 0/5*       | 8/10       | /          | /          | /          | 0/48       | 0/19       | /          | /          | 1/55 |
|                           |            | <b>S02</b> | S01        | 4             | /          | 8/15       | /          | /          | /          | /          | /          | /          | 1/39       | /          | /          | /    |
|                           |            | <b>S02</b> | S09        | 3             | 0/5        | /          | /          | /          | /          | 0/60       | /          | /          | /          | /          | /          | /    |
|                           |            | <b>S02</b> | S04**      | 3             | 0/5        | 0/10**     | 5/5        | /          | /          | 0/20       | 1/44       | /          | /          | /          | /          | /    |
|                           |            | <b>S02</b> | S08        | 2             | /          | /          | /          | /          | /          | /          | /          | /          | /          | /          | 0/20       | /    |
|                           |            | <b>S02</b> | S10        | 2             | /          | /          | 8/10       | /          | /          | /          | /          | /          | 0/20       | /          | /          | /    |
|                           |            | <b>S02</b> | S12        | 4             | /          | /          | 2/5        | /          | 5/5        | 0/78       | /          | /          | /          | /          | /          | /    |

**Figure S14** Cross-pollinations between plants having haplotype S02 and plants having haplotype S07 are mostly successful, indicating that S02 and S07 are distinct functional S-haplotypes, while sharing sequence A01 in common. See Figure S1 for legend details.
