# Supplementary material for: Self-Incompatibility in Brassicaceae: Identification and Characterization of SRK-Like Sequences Linked to the S-Locus in the Tribe Biscutelleae
Source: PubMed Central journal article supplement (PMC4065267; doi:10.1534/g3.114.010843), 2013-12-23
Supplement: supp_4.6.983_TableS1.pdf [file supp_4.6.983_TableS1.pdf]

**Table S1** Accession numbers of SRK-related sequences for Figure 1, from *Arabidopsis halleri* (Aha), *A. lyrata* (Aly), *A. thaliana* (Ath), *Brassica oleraceae* (Bol), *B. rapa* (Bra) and *Capsella grandiflora* (Cgr).

| <i>Sequence</i>       | <i>Accession number</i> | <i>Sequence</i>        | <i>Accession number</i> |
|-----------------------|-------------------------|------------------------|-------------------------|
| <i>AhaSRK03</i>       | EU075126                | <i>BolSRK06</i>        | M76647.1                |
| <i>AhaSRK04</i>       | DQ520278                | <i>BolSRK07</i>        | AB070624.1              |
| <i>AhaSRK11</i>       | EU075132                | <i>BolSRK08</i>        | AB054708.1              |
| <i>AhaSRK12</i>       | EU075133                | <i>BolSRK11</i>        | AB054709.1              |
| <i>AhaSRK13</i>       | EU075134                | <i>BolSRK12</i>        | AB180901.1              |
| <i>AhaSRK15</i>       | EU075136                | <i>BolSRK13</i>        | AB024420.2              |
| <i>AhaSRK20</i>       | EU075141                | <i>BolSRK15</i>        | AB180903.1              |
| <i>AhaSRK22</i>       | EU075143                | <i>BolSRK16</i>        | AB054710.1              |
| <i>Aly327420</i>      | XM_002872670.1          | <i>BolSRK18</i>        | AB032473.1              |
| <i>AlyARK3_946052</i> | XM_002867806.1          | <i>BolSRK23</i>        | AB013720.1              |
| <i>AlySRK03</i>       | AF328992                | <i>BolSRK24</i>        | AB054712.1              |
| <i>AlySRK04</i>       | AF328994                | <i>BolSRK25</i>        | AB054713.1              |
| <i>AlySRK05</i>       | AF328990                | <i>BolSRK29</i>        | Z30211.1                |
| <i>AlySRK06</i>       | DQ520281                | <i>BolSRK33</i>        | AB054714.1              |
| <i>AlySRK08</i>       | AY186766                | <i>BolSRK35</i>        | AB054715.1              |
| <i>AlySRK09</i>       | DQ520282                | <i>BolSRK36</i>        | AB054716.1              |
| <i>AlySRK10</i>       | AY186767                | <i>BolSRK38</i>        | AB054717.1              |
| <i>AlySRK12</i>       | AY186769                | <i>BolSRK39</i>        | AB054718.1              |
| <i>AlySRK13</i>       | AF328993                | <i>BolSRK45</i>        | AB054719.1              |
| <i>AlySRK14</i>       | AY186770                | <i>BolSRK50</i>        | AB054720.1              |
| <i>AlySRK15</i>       | AY186771                | <i>BolSRK51</i>        | AB054721.1              |
| <i>AlySRK16</i>       | DQ520283                | <i>BolSRK57</i>        | AB054722.1              |
| <i>AlySRK18</i>       | DQ520284                | <i>BolSRK58</i>        | AB054723.1              |
| <i>AlySRK19</i>       | AF328998                | <i>BolSRK60</i>        | AB032474.1              |
| <i>AlySRK20</i>       | AF328995                | <i>BolSRK62</i>        | AB054724.1              |
| <i>AlySRK22</i>       | DQ520285                | <i>BolSRK64</i>        | AB054725.1              |
| <i>AlySRK23</i>       | AF328997                | <i>BraARK03_013522</i> | AB041621.1              |
| <i>AlySRK25</i>       | DQ520286                | <i>BraSRK46</i>        | AB013718.2              |
| <i>AlySRK27</i>       | EU878017                | <i>BraSRK54</i>        | AB219162.1              |
| <i>AlySRK29</i>       | AY186776                | <i>BraSRK60</i>        | AB097116.1              |
| <i>AlySRK30</i>       | EU878018                | <i>CgrSRK01</i>        | DQ530637.1              |
| <i>AlySRK33</i>       | EU878019                | <i>CgrSRK02</i>        | DQ530638.1              |
| <i>AlySRK35</i>       | EU878021                | <i>CgrSRK03</i>        | DQ530639.1              |
| <i>AlySRK36</i>       | DQ520288                | <i>CgrSRK04</i>        | DQ530640.1              |
| <i>AlySRK37</i>       | DQ520289                | <i>CgrSRK05</i>        | DQ530641.1              |
| <i>AlySRK38</i>       | EU165341                | <i>CgrSRK06</i>        | DQ530642.1              |
| <i>AlySRK39</i>       | EU878022                | <i>CgrSRK07</i>        | EF530735.1              |
| <i>AlySRK43</i>       | EU878024                | <i>CgrSRK09</i>        | FJ649955.1              |
| <i>AlySRK44</i>       | EU878025                | <i>CgrSRK11</i>        | FJ649956.1              |
| <i>AthSRKC</i>        | KC207414.1              | <i>CgrSRK14</i>        | FJ649958.1              |
| <i>BolSRK01</i>       | AB054706.1              | <i>CgrSRK18</i>        | FJ649953.1              |
| <i>BolSRK02</i>       | AJ306588.1              | <i>CgrSRK24</i>        | FJ649962.1              |
| <i>BolSRK03</i>       | X79432.1                | <i>CgrSRK37</i>        | FJ649959.1              |
| <i>BolSRK05</i>       | Y18259.1                | <i>CgrSRK38</i>        | FJ649960.1              |
