# Supplementary material for: Self-Incompatibility in Brassicaceae: Identification and Characterization of SRK-Like Sequences Linked to the S-Locus in the Tribe Biscutelleae
Source: PubMed Central journal article supplement (PMC4065267; doi:10.1534/g3.114.010843), 2013-12-23
Supplement: supp_4.6.983_TableS2.pdf [file supp_4.6.983_TableS2.pdf]

**Table S2 List and sequences of primers targeting candidate sequences of the pollen-recognition extracellular domain of the *SRK* gene in *Biscutella neustriaca*.** T<sub>m</sub> indicates the optimized hybridization temperature during PCR reaction. When the number of PCR cycles used is different from 35 cycles, it is indicated after T<sub>m</sub> in parenthesis. Generalist primers amplify several sequences belonging to the same sequences class.

| Class             |          | F-specific primer       |          | R-specific primer      | T <sub>m</sub> (°C) | Sequence(s) amplified |
|-------------------|----------|-------------------------|----------|------------------------|---------------------|-----------------------|
| <i>Bne327420L</i> | X-F001   | GTACCGGAGATGCGGAAGT     | X-R540   | GAGCTCTCCGGACCAAATTA   | 60                  | 1 and 2               |
| <i>BneSRKA</i>    | A01-F142 | AGGTGGAATTCGACGTTAAA    | A01-R558 | GTAATTACTGATATCCAATA   | 52                  | 1                     |
|                   | A02-F277 | TTTACGAAGAGGAATCCGGT    | SLGR     |                        | 50                  | 2                     |
|                   | A03-F074 | TTAAACTCACCAGCCCAGAAT   | A03-R421 | TATCCACAGTTGCCGCCCTTG  | 62                  | 3                     |
|                   | A04-F068 | ACACTTTTCAACTCACCAAGCGA | SLGR     |                        | 59                  | 4 and 5               |
|                   | A06-F238 | GACATGGACACTTCACCGAT    | A06-R514 | CAGACCCATTATTTTCGGACA  | 62                  | 6                     |
|                   | A-F020   | GGGAACACATGGTTTCCAAC    | SLGR     |                        | 50                  |                       |
|                   | A-F300   | GTGGGAAAGGACAAATGGAA    | SLGR     |                        | 60                  | Generalist A          |
|                   | A-F294   | GSWTGAGTGGGAAAKGRCAA    | A-R461   | CYGCACATYTTTCTCACA     | 60                  |                       |
|                   | A-F330   | TGTGAGGAAGACACGGTTGA    | SLGR     |                        | 50                  | Generalist A and C01  |
| <i>BneSRKB</i>    | B01-F079 | ATGACCAACCAAACCATACAG   | SLGR     | ATCTGACATAAAGATCTTGACC | 52                  | 1                     |
|                   | B-F075   | CTTCATGACCAACCAAAGCA    | B-R495   | CGCATTGCAAATCCTCTAC    | 60                  | 3                     |
|                   | B04-F159 | ATATGGATGGAGACAGATGT    | B04-R371 | GTAAGCCATCTCCCCTGTA    | 60                  | 4                     |
|                   | B05-F112 | GTGAGTTTACGGGTCTTTTCG   | B05-R405 | TGTAGTATCCGGCAACTTAA   | 60                  | 5                     |
|                   | B06-F276 | GTTTGATCCTAGAAATCCACAT  | B06-R463 | CTTTAAGGCACCTTCTCTCA   | 60                  | 6                     |
|                   | B09-F147 | GATTCCGATATCAGATGACT    | B-R564   | WRCATAATCCGAATATCAA    | 50                  | 9                     |
|                   | B10-F238 | GACATGAACACGTCACCGGT    | B10-R452 | TTCTTACATTCTTTCGTATCA  | 52                  | 10                    |
|                   | B11-F153 | GACATCATATGAATGGAGCCCG  | B-R539   | AKCAYTYCYKTCCAAATAAC   | 52                  | 11                    |
|                   | B12-F110 | CTGTGAGTTTTACGGGCTTT    | B12-R408 | TGTAGTGTCCGGCAGCTTTACC | 63                  | 12                    |
|                   | B17-F115 | ACTTTCTGGGGTATTTAAATA   | B-R388   | TTATCTTCTCARCCSGTA     | 58<br>(40c)         | 17                    |
|                   | B-F055   | GATGARATCGCTTACACGTT    | B-R564   | WRCATAATCCGAATATCAA    | 54                  |                       |
|                   | B-F064   | GCTTACACGTTCYTMATGACC   | B-R388   | TTATCTTCTCARCCSGTA     | 50                  | Generalist B          |
|                   |          |                         | B-R539   | AKCAYTYCYKTCCAAATAAC   | 60                  |                       |
| <i>BneSRKC</i>    | C-F001   | GCTGCAGAGGTGACAAGTTTT   | C-R173   | GGATGGGTTGTCTGATTGG    | 56                  | 1                     |
