# Supplementary material for: Self-Incompatibility in Brassicaceae: Identification and Characterization of SRK-Like Sequences Linked to the S-Locus in the Tribe Biscutelleae
Source: PubMed Central journal article supplement (PMC4065267; doi:10.1534/g3.114.010843), 2013-12-23
Supplement: supp_4.6.983_TableS3.pdf [file supp_4.6.983_TableS3.pdf]

**Table S3 Result of test of deviation from Mendelian expectations in collection F1 (See Table 3 for genotypes).** For each cohort size  $n$ , 100,000 cohorts were simulated according to two scenarios: (1) assuming that both parents were heterozygous at the  $S$ -locus and (2) assuming that one parent was homozygous and one parent heterozygous. For each cohort, the following information is shown: number of seedlings (cohort size), name of F0 parental individuals, absolute expected frequency of each genotype in the cohort and difference (deviation) between observed and expected frequencies under each scenario.

| Seedling collection | $n^a$ | Parents <sup>b</sup> |    | Expected genotype frequency in F1 (SD) <sup>c</sup> |                 | Deviation from expected genotype frequency (associated $p$ -value) <sup>d</sup> |                   |                  |                     |                |            |
|---------------------|-------|----------------------|----|-----------------------------------------------------|-----------------|---------------------------------------------------------------------------------|-------------------|------------------|---------------------|----------------|------------|
|                     |       |                      |    |                                                     |                 | (1) He <sup>e</sup>                                                             |                   |                  | (2) Ho <sup>f</sup> |                |            |
|                     |       |                      |    |                                                     |                 | 1                                                                               | 2                 | 3                | 4                   | 1              | 2          |
| F1o                 | 7     | 3                    | 6  | 1.75<br>(1.15)                                      | 3.50<br>(1.32)  | -2.25*<br>(0.01)                                                                | -1.25 (0.07)      | -                | -                   | -0.5<br>(0.23) | 0.5 (0.50) |
|                     | 13    | 3                    | 7  | 3.25<br>(1.56)                                      | 6.50 (1.8)      | -3.75*<br>(0.01)                                                                | -2.75*<br>(0.03)  | -                | -                   | -0.5<br>(0.30) | 0.5 (0.50) |
|                     | 5     | 8                    | 4  | 1.25<br>(0.97)                                      | 2.50<br>(1.12)  | -0.75<br>(0.11)                                                                 | 0.25 (0.37)       | -0.75<br>(0.10)  | -                   | -              | -          |
|                     | 7     | 8                    | 6  | 1.75<br>(1.15)                                      | 3.50<br>(1.33)  | 0.75<br>(0.45)                                                                  | -1.25 (0.07)      | -1.25<br>(0.07)  | -                   | -              | -          |
|                     | 21    | 9                    | 4  | 5.25<br>(1.98)                                      | 10.50<br>(2.29) | 1.25<br>(0.37)                                                                  | 4.25*<br>(0.02)   | -4.75*<br>(0.01) | -0.75<br>(0.26)     | -              | -          |
|                     | 7     | 9                    | 6  | 1.75<br>(1.14)                                      | 3.50<br>(1.32)  | -1.25<br>(0.07)                                                                 | -0.25 (0.24)      | -0.25<br>(0.24)  | -                   | -              | -          |
|                     | 6     | 10                   | 4  | 1.50<br>(1.06)                                      | 3.00<br>(1.22)  | 0.5 (0.47)                                                                      | -2.5* (0.01)      | 0.5 (0.47)       | -                   | -              | -          |
|                     | 16    | 10                   | 6  | 4.00<br>(1.73)                                      | 8.00<br>(2.00)  | 2 (0.20)                                                                        | -2<br>(0.08)      | -2 (0.08)        | 2 (0.20)            | -              | -          |
| F1c                 | 14    | 4                    | 20 | 3.50<br>(1.62)                                      | 7.00<br>(1.87)  | 0.5 (0.48)                                                                      | 1.5 (0.28)        | -0.5 (0.26)      | -1.5<br>(0.11)      | -              | -          |
|                     | 30    | 12                   | 8  | 7.50<br>(2.37)                                      | 15.00<br>(2.74) | 0.5 (0.49)                                                                      | 1.5 (0.35)        | 1.5 (0.35)       | -3.5<br>(0.05)      | -              | -          |
|                     | 30    | 17                   | 18 | 7.50<br>(2.37)                                      | 15.00<br>(2.73) | -5.5*<br>(0.01)                                                                 | -9.5***<br>(0.00) | -                | -                   | 2 (0.29)       | -2 (0.18)  |
|                     | 50    | 18                   | 1  | 12.50<br>(3.06)                                     | 25.00<br>(3.54) | 1.5 (0.38)                                                                      | -2.5 (0.16)       | 3.5 (0.16)       | -2.5<br>(0.16)      | -              | -          |
|                     | 14    | 21                   | 8  | 3.50<br>(1.62)                                      | 7.00<br>(1.87)  | -0.5<br>(0.26)                                                                  | 2.5 (0.10)        | -1.5 (0.11)      | -0.5<br>(0.26)      | -              | -          |

a cohort size

b F0 collection

c expected genotype frequency in F1 collection following symbols are associated with significance of  $p$ -values: "\*\*\*\*":  $p \leq 0.001$ ; "\*\*":  $p \leq 0.05$ .

d expected frequency : see table 3

e assuming that both parents are heterozygous at the  $S$ -locus

f assuming that parent 1 is homozygous and that parent 2 is heterozygous at the  $S$ -locus - Not applied for cohorts with more than two genotypes
