# Supplementary material for: Self-Incompatibility in Brassicaceae: Identification and Characterization of SRK-Like Sequences Linked to the S-Locus in the Tribe Biscutelleae
Source: PubMed Central journal article supplement (PMC4065267; doi:10.1534/g3.114.010843), 2013-12-23
Supplement: supp_4.6.983_TableS4.pdf [file supp_4.6.983_TableS4.pdf]

**Table S4** Accession numbers of SRK-L sequences found in *Biscutella neustriaca*.

| Sequence            | Accession number |
|---------------------|------------------|
| <i>BneSRKL_A01a</i> | KF905296         |
| <i>BneSRKL_A01b</i> | KF905297         |
| <i>BneSRKL_A02</i>  | KF905298         |
| <i>BneSRKL_A03</i>  | KF905299         |
| <i>BneSRKL_A04</i>  | KF905300         |
| <i>BneSRKL_A05</i>  | KF905301         |
| <i>BneSRKL_A06</i>  | KF905302         |
| <i>BneSRKL_A07</i>  | KF905303         |
| <i>BneSRKL_B01</i>  | KF905304         |
| <i>BneSRKL_B03</i>  | KF905305         |
| <i>BneSRKL_B04</i>  | KF905306         |
| <i>BneSRKL_B05</i>  | KF905307         |
| <i>BneSRKL_B06</i>  | KF905308         |
| <i>BneSRKL_B09</i>  | KF905309         |
| <i>BneSRKL_B10</i>  | KF905310         |
| <i>BneSRKL_B11</i>  | KF905311         |
| <i>BneSRKL_B12</i>  | KF905312         |
| <i>BneSRKL_B13</i>  | KF905313         |
| <i>BneSRKL_B17</i>  | KF905314         |
| <i>BneSRKL_B18</i>  | KF905315         |
| <i>BneSRKL_C01</i>  | KF905295         |
| <i>BneARK3L_1</i>   | KF905320         |
| <i>BneARK3L_2</i>   | KF905321         |
| <i>BneARK3L_3</i>   | KF905322         |
| <i>BneARK3L_4</i>   | KF905323         |
| <i>BneARK3L_5</i>   | KF905324         |
| <i>Bne327420L_1</i> | KF905316         |
| <i>Bne327420L_2</i> | KF905317         |
| <i>Bne327420L_3</i> | KF905318         |
| <i>Bne327420L_4</i> | KF905319         |
